# Supplementary material
Source: PubMed Central journal article supplement (PMC3887742)
Supplement: molcell-33-1-99-12-supplementary.pdf [file molcell-33-1-99-12-supplementary.pdf]

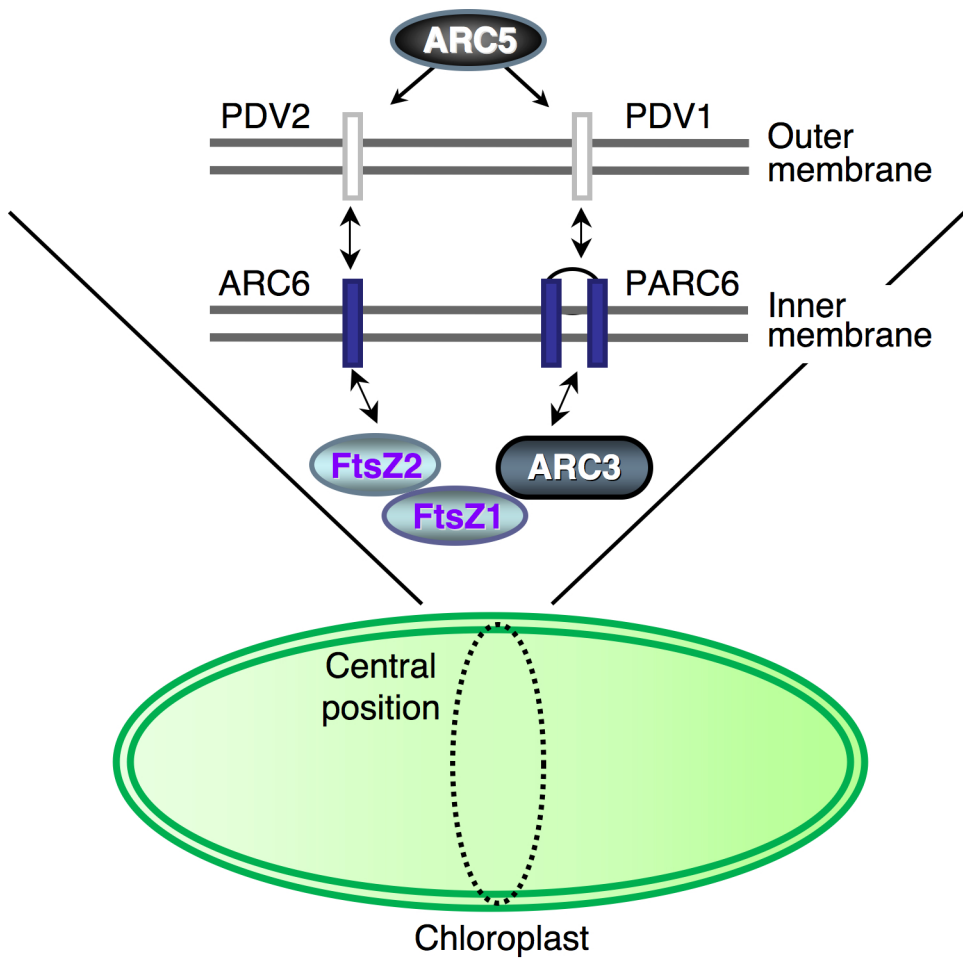

Fig S1. Cho et al.

**Supplementary Table S1. Oligonucleotides used in this study.**

| Oligo name      | Oligonucleotide            |
|-----------------|----------------------------|
| <i>ARC3_f</i> : | 5'-TCGGTAGTCGCAAGGAGTCT-3' |
| <i>ARC3_r</i> : | 5'-TGTGACCAACTCCAAAACCA-3' |
| <i>PDV1_f</i> : | 5'-TGGGAGAAATGGAGATCGAA-3' |
| <i>PDV1_r</i> : | 5'-TACGCCTTTCACATGGTTGA-3' |
| <i>PDV2_f</i> : | 5'-GGCTTTTGCGTATTCGTGAT-3' |
| <i>PDV2_r</i> : | 5'-CAAGAACTTTCCTGGTGGA-3'  |
